# Supplementary material for: A high temperature reversible phase transition in a supramolecular complex of 15-crown-5 with tetraphenylboron sodium
Source: Royal Society of Chemistry journal article supplement (doi:10.1039/c8nj02754d), 2018-01-01
Supplement: c8nj02754d1.pdf [file c8nj02754d1.pdf]

# **A high temperature reversible phase transition in a supramolecular complex of 15-crown-5 with tetraphenylboron sodium**

Guo-Jun Yuan,<sup>\*a,b,c</sup> Shao-Xian Liu,<sup>a</sup> Zheng-Fang Tian,<sup>d</sup> Xiao-Ming Ren,<sup>\*b</sup>

<sup>a</sup> Key Laboratory of Advanced Functional Materials of Nanjing, Department of Chemistry, Nanjing Xiaozhuang University, Nanjing 211171, P. R. China

<sup>b</sup> State Key Laboratory of Materials-Oriented Chemical Engineering and College of Chemistry & Molecular Engineering, Nanjing Tech University, Nanjing 210009, P. R. China

<sup>c</sup> Department of Chemistry, University of California, Riverside, California 92521, USA

<sup>d</sup> School of Chemical Engineer, Huanggang Normal University, Huanggang 438000, P. R. China

Tel.: +86 25 58139476

Fax: +86 25 58139481

Email: [ahchljygj@163.com](mailto:ahchljygj@163.com) (GJY); [xmren@njtech.edu.cn](mailto:xmren@njtech.edu.cn) (XMR)

## **Contents**

Figure S1 Experimental and simulated PXRD patterns of **1**

Figure S2 TG plots of **1**

Figure S3 Packing diagrams in crystal structure of **1** viewed along (a) c-axis (b) a-axis

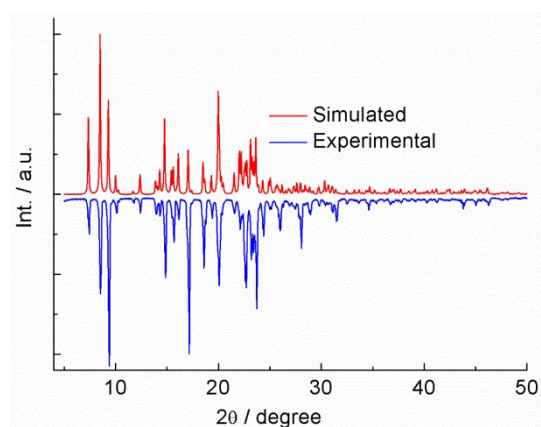

Figure S1 Experimental and simulated PXRD patterns of **1**.

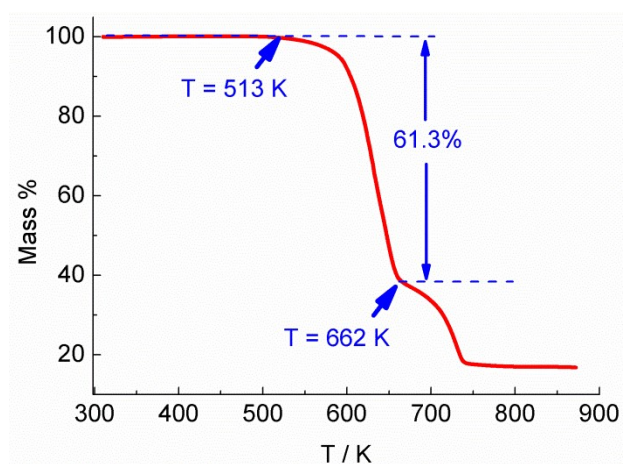

Figure S2 TG plots of **1**.

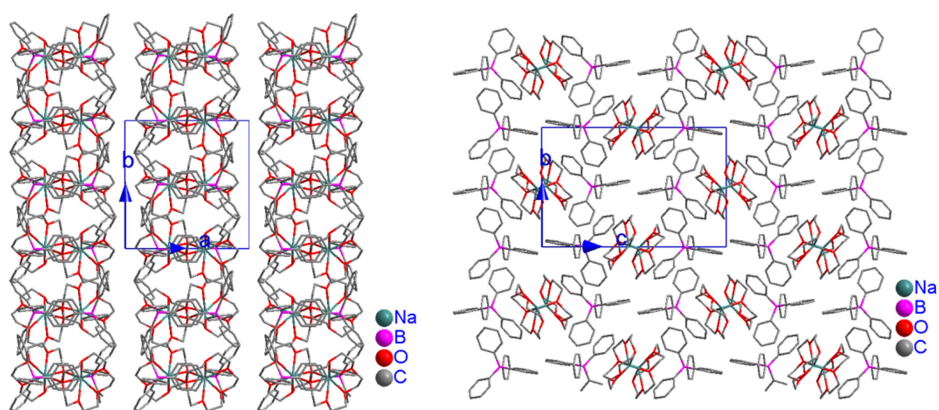

Figure S3 Packing diagrams in crystal structure of **1** viewed along (a) c-axis (b) a-axis.
